# Supplementary material for: Mast Cell Coupling to the Kallikrein–Kinin System Fuels Intracardiac Parasitism and Worsens Heart Pathology in Experimental Chagas Disease
Source: PubMed Central journal article supplement (PMC5539176; doi:10.3389/fimmu.2017.00840), 2017-08-02

## *Supplementary Material*

# **Mast Cell Coupling to the Kallikrein-kinin System Fuels Intracardiac Parasitism and Worsens Heart Pathology in Experimental Chagas Disease**

Clarissa R. Nascimento<sup>1†</sup>, Daniele Andrade<sup>1†</sup>, Carla Eponina Carvalho-Pinto<sup>2</sup>, Rafaela Rangel Serra<sup>1</sup>, Lucas Vellasco<sup>1</sup>, Guilherme Brasil<sup>1</sup>, Erivan Schnaider Ramos-Junior<sup>1,3</sup>, Julia Barbalho da Mota<sup>1</sup>, Larissa Nogueira Almeida<sup>1</sup>, Marcus V. Andrade<sup>4,5</sup>, Maria de Nazaré Correia Soeiro<sup>6</sup>, Luiz Juliano<sup>7</sup>, Patrícia Hessab Alvarenga<sup>8</sup>, Ana Carolina Oliveira<sup>1</sup>, Fernando Lencastre Sicuro<sup>9</sup>, Antônio C. Campos de Carvalho<sup>1</sup>, Erik Svensjö<sup>1</sup> and Julio Scharfstein<sup>1\*</sup>

**\*Correspondence:**

Julio Scharfstein.

[jscharf2@gmail.com](mailto:jscharf2@gmail.com)

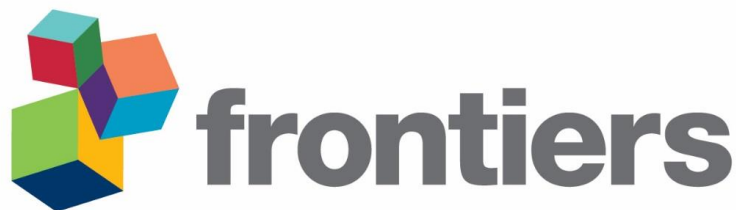

**Supplementary Figure 1. The delayed leakage (>30 min) induced by DXS is abolished upon treatment with MC stabilizer or B2R antagonist.** Maximal Leakage responses (RFU, mean  $\pm$  SD) recorded in the HCP sensitized for at least 30 min with DXS (4  $\mu$ M). The graph depicts responses induced by DXS in controls (absence of treatment) or HCP pretreated with cromoglycate (40 mg/kg, i.p., n=2) and HOE-140.

**Supplementary Figure 2. Enzyme assays showing that heparinized hamster plasma is not spontaneously activated.** Assay was performed with HK mimetic substrate detect PKa activity in fresh hamster plasma (heparin 4 kDa) incubated with the contact activator DXS (4 nM). The kinetics

of hydrolysis was performed at 37°C. Substrate hydrolysis was monitored by the increase of fluorescence with time (mean  $\pm$  SD). Data are representative of 3 independent experiments run in duplicates.

**Supplementary Figure 3. Microvascular leakage in the HCP sensitized with DXS and captopril is abolished upon treatment with MC stabilizer.** HCPs were superfused for 10 min with DXS (2  $\mu$ M) and captopril, followed by 5 min of histamine (4  $\mu$ M) application. Where indicated, the hamsters were pretreated (i.p.) with cromoglycate. Data show 3 independent experiments.

**Supplementary Figure 4. The microvascular leakage induced by TCT/histamine involves the MC/KKS pathway.** TCT control group (n=8) involved HCP treatment with captopril in the absence of histamine. Prior to TCT/histamine application, pharmacological interventions were performed with cromoglycate (40 mg/kg i.p., pretreatment, n = 6); HOE-140 (n=5) and PKSI-527 (n=5), applied for 5 min. Data are expressed as maximal RFU (mean  $\pm$  SD), measured during 30 min. Statistical analysis were done by ANOVA and Wilcoxon. \* P < 0.05 (TCT/Hist versus TCT or TCT/Hist/inhibitor/antagonist).

**Supplementary Figure 5. Specificity controls showing that Captopril, HOE-140 and cromoglycate do not modulate plasma leakage induced by histamine.** Maximal leakage responses (Mean  $\pm$  SD) induced by histamine 4  $\mu$ M during 5 minutes of superfusion of HCP (steady state). Histamine was applied in HCP pretreated (or not, control) with captopril (10  $\mu$ M, n= 9), cromoglycate (40 mg/kg i.p., pretreatment, n=6), (4) PKSI-527 (20  $\mu$ M, n=5) and (5) HOE-140 (0.5  $\mu$ M, n = 6). There is no statistical statistic difference between the histamine responses (P > 0.05).

**Supplementary Figure 6. The MC stabilizer cromoglycate does not impair *T. cruzi* infection of primary heart cells.** Invasion assays performed by incubating primary heart cells with Dm28c TCTs (parasite/host ratio 1:1) in BSA-DMEM supplemented, or not, with MC stabilizer (cromoglycate). HOE-140 was added as an internal control. After 3 h of interaction, the host cells were stained with Giemsa. Representative results of 2 or 3 independent experiments were expressed as number of intracellular parasites/100 cells (mean  $\pm$  SD).

Supplementary Figure 1

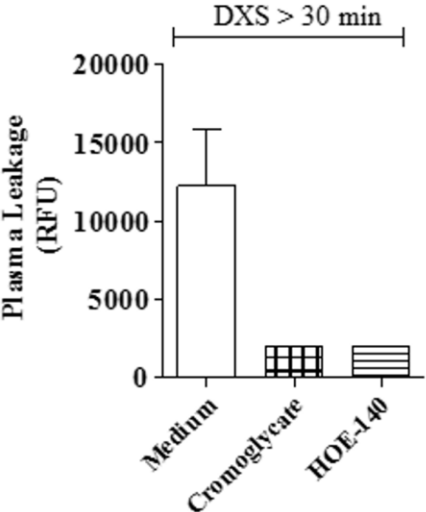

Supplementary Figure 2

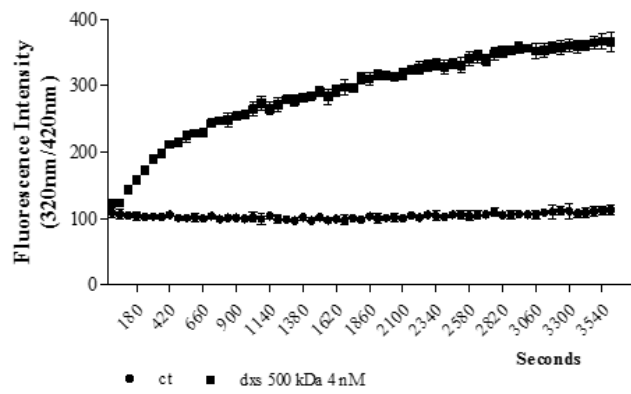

Supplementary Figure 3

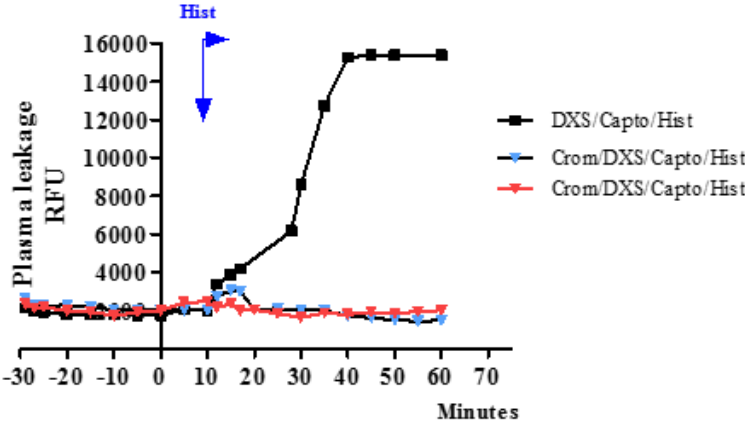

Supplementary Figure 4

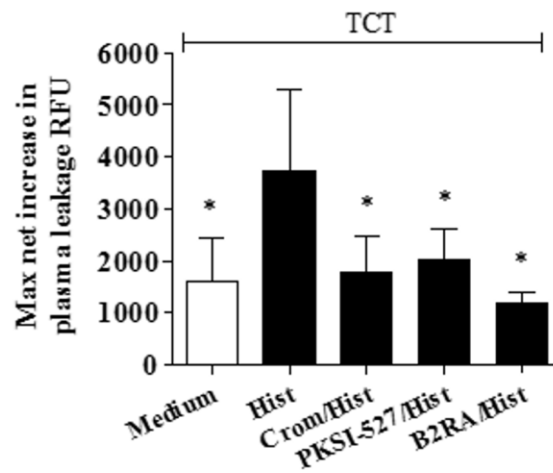

Supplementary Figure 5

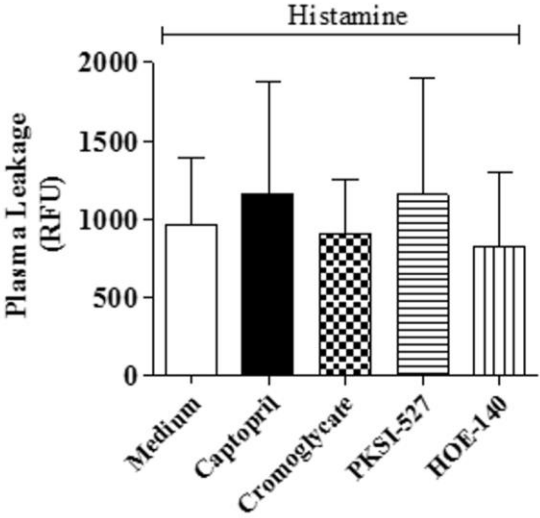

Supplementary Figure 6

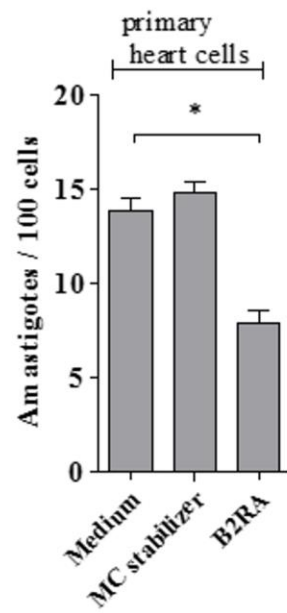

Supplement: Presentation_1.pdf [file Presentation_1.pdf]
